# Supplementary material for: Genetic Determinants of Response to Warfarin during Initial Anticoagulation
Source: Atypon-hosted journal article supplement (doi:10.1056/nejmoa0708078), 2008-03-05
Supplement: nejm_schwarz_999sa1.pdf [file nejm_schwarz_999sa1.pdf]

## Supplementary Appendix

This appendix has been provided by the authors to give readers additional information about their work.

Supplement to: Schwarz UI, Ritchie MD, Bradford Y, et al. Genetic determinants of response to warfarin during initial anticoagulation. *N Engl J Med* 2008;358:999-1008.

**Online Supplement Table 1.** Methods, Primers and Reaction Conditions of the Fluorescent Allele-specific Oligonucleotide Ligation Assay (OLA) used to assess *CYP2C9* Genotype.

| Nucleotide<br>Change<br>(rs number)       | Major allele primer*                                                  | Minor allele primer*                                              | Ligation primer**      |
|-------------------------------------------|-----------------------------------------------------------------------|-------------------------------------------------------------------|------------------------|
|                                           | 5'-FAM/TAMARA - tagged                                                | 5'-HEX/ROX - tagged                                               |                        |
| <i>CYP2C9</i> *2<br>430C>T<br>(1799853)   | 5'-FAM-<br>AATGATCGACGAGACACTCTCGC<br>CAAGAGGAGCATTGAGGACC-3'         | 5'-HEX-<br>AAACGAGCTGCCGCGCAAGATAAGA<br>GGAGCATTGAGGACT-3'        | 5'-P-GTGTTC AAGAGGA-3' |
| <i>CYP2C9</i> *3<br>1075A>C<br>(1057910)  | 5'-TAMARA-<br>ACATTCGCGATCGCCGCCCGCTTT<br>ACGAGGTCCAGAGATACA-3'       | 5'-ROX-<br>TCGCGACCGCATCCCAATCTCGAGGT<br>CCAGAGATACC-3'           | 5'-P-TTGACCTTCTCC-3'   |
| <i>CYP2C9</i> *5<br>1080C>G<br>(28371686) | 5'-FAM-<br>ACATGACATTCGCGATCGCCGCC<br>GCTTTGGTCCAGAGATACATTGAC<br>-3' | 5'-HEX-<br>ATACGGTATCGCGACCGCATCCCAAT<br>CTGGTCCAGAGATACATTGAG-3' | 5'-P-CTTCTCCCCAC-3'    |

\*5'-fluorescently tagged allele-specific primers with FAM or TAMARA for the major allele, and HEX or ROX for the minor allele.

The 3' - modifications at the polymorphic site are shown in bold.

\*\*Ligation primers with 5'-phosphate (P) modification.

Methods: Two 5'-fluorescently labeled allele-specific primers that differ in sequence at the polymorphic site (3') and one ligation primer were used for each allele. Allele discrimination occurred by 3' match or mismatch of the allele-specific primer at the polymorphic site with subsequent ligation with the ligation primer or lack of ligation, respectively. Then, capillary electrophoresis of ligation products (automated sequencer, Applied Biosystems 3730), followed by laser excitation coupled with a CCD camera was carried out. Genotypes were discriminated based upon fluorescence as well as product size using ABI GeneMapper 3.5 software (Applied Biosystems). Assay validation was achieved by DNA sequencing of amplicons representing all possible allele combinations.

Ligase chain reaction conditions: initial denaturation at 96°C for 2 min, then 30 cycles at 94°C for 15 seconds and 1 min at 37°C in a 10 µl reaction volume. Reaction solution contained 10-20ng PCR-amplified target sequence (amplicons were Sephadex column purified if needed), 0.1 pmol of each allele-specific primer, 15 pmol of ligation primer, 15 units of *Taq* ligase (NEB), and a buffer (20 mM Tris-HCl, 25 mM potassium acetate, 10 mM magnesium acetate, and 10 mM DTT, 1 mM NAD, 0.1% Triton X-100; pH of 7.6 at 25°C).

**Online Supplement Table 2.** Custom and pre-designed (validated or functionally tested) TaqMan<sup>®</sup> SNP Genotyping Assays used to Assess *VKORC1* Genotype (7900 HT Sequence Detection System, Applied Biosystems, Foster City, CA, USA).

| <i>VKORC1</i> variant | rs number | Primer  | Primer Sequence (5' - 3') | Reporter Sequence (5' - 3') | Reporter Dye | Assay Type (ID) |
|-----------------------|-----------|---------|---------------------------|-----------------------------|--------------|-----------------|
| 3673                  | rs9923231 | Forward | GGCCTCCCAAATGCTAGGATTATA  | ATTGGCCGGGTGCG              | VIC          | Custom          |
|                       |           | Reverse | AAGTCAAGCAAGAGAAGACCTGAAA | ATTGGCCAGGTGCG              | FAM          |                 |
| 5808                  | rs2884737 | Forward | GCGGTAGAGATTGACGATGGT     | CCCCTTCCCCTGCGC             | VIC          | Custom          |
|                       |           | Reverse | GCAGCCATCGCCAACAC         | CCCCTTCACCTGCGC             | FAM          |                 |
| 6484                  | rs9934438 | Forward | CACCTGGGCTATCCTCTGTTC     | CCTAGTCCAAGAGTCGAT          | VIC          | Custom          |
|                       |           | Reverse | CCCGGTGCCAGGAGATC         | CTAGTCCAAGGGTCGAT           | FAM          |                 |
| 6853                  | rs8050894 | Forward | NA                        | NA                          | NA           | Pre-designed    |
|                       |           | Reverse | NA                        | NA                          | NA           | (C_2847860_10)  |
| 7566                  | rs2359612 | Forward | NA                        | NA                          | NA           | Pre-designed    |
|                       |           | Reverse | NA                        | NA                          | NA           | (C_26291751_10) |

Footnote: NA - not available for pre-designed TaqMan<sup>®</sup> assays.  
PharmGKB Accession IDs for the CYP2C9 data are PA130477740-PA130478731.

**Online Supplement Table 3. Bleeding Events**

| <b>Bleeding Event</b> | <b>Patient ID</b> | <b>CYP2C9</b> | <b>VKORC1</b> | <b>Time After Warfarin Initiation (Days)</b> | <b>Warfarin Dose (mg/day)</b> | <b>INR</b> | <b>Warfarin Dose at event (mg/day)</b> | <b>INR at Event</b> | <b>Event Description</b>                                |
|-----------------------|-------------------|---------------|---------------|----------------------------------------------|-------------------------------|------------|----------------------------------------|---------------------|---------------------------------------------------------|
| <b>Major</b>          | 6                 | *1/*1         | NonA/NonA     | 21                                           | 5.0                           | 1.3        | 6.1                                    |                     | Intracranial hemorrhage, fatal                          |
|                       | 63                | *2/*2         | A/NonA        | 82                                           | 2.7                           | 2.4        | 2.0                                    | 2.2                 | Gastrointestinal bleeding with cardiogenic shock, fatal |
|                       | 129               | *1/*3         | NonA/NonA     | 85                                           | 6.6                           | 2.4        | 6.8                                    | 2.7                 | Intracranial hemorrhage, fatal                          |
|                       | 8                 | *1/*1         | A/A           | 8                                            | 1.5                           | 2.1        | 2.5                                    | 3.2                 | Gastrointestinal bleeding                               |
|                       | 170               | *1/*1         | A/NonA        | 3                                            | 5.4                           | 1.6        | 5.0                                    | 1.9                 | Unexplained decrease in hemoglobin                      |
|                       | 221               | *1/*1         | A/NonA        | 24                                           | 3.0                           | 1.5        | 3.8                                    | 1.7                 | Gastrointestinal bleeding                               |
|                       | 281               | *1/*1         | A/NonA        | 10                                           | 2.3                           | 3.0        | 5.0                                    | 6.3                 | Gastrointestinal bleeding                               |
|                       | 302               | *1/*3         | A/NonA        | 27                                           | 2.2                           | 4.2        | 5                                      | 4.7                 | Hematoma                                                |
| <b>Minor</b>          | 302               | *1/*3         | A/NonA        | 13                                           | 2.2                           | 4.2        | 4.3                                    | 12.3                | Anemia                                                  |
|                       | 52                | *1/*1         | A/NonA        | 3                                            | 4.6                           | 2.1        | 5.0                                    | 4.9                 | Epitaxis                                                |
|                       | 138               | *1/*1         | NonA/NonA     | 61                                           | 5.2                           | 2.3        | 5.0                                    | 3.4                 | Hematemesis                                             |
|                       | 165               | *1/*2         | A/A           | 11                                           | 3.2                           | 2.5        | 2.5                                    | 4                   | Hematoma                                                |
|                       | 297               | *2/*2         | A/NonA        | 96                                           | 4.0                           | 2.4        | 3.9                                    | 4                   | Gross Hematuria                                         |
